# Supplementary material for: SARS-CoV-2 IgG seropositivity in a cohort of 449 non-hospitalized individuals during Spanish COVID-19 lockdown
Source: PubMed Central journal article supplement (PMC8566591; doi:10.1038/s41598-021-00990-4), 2021-11-03
Supplement: 41598_2021_990_MOESM1_ESM.pdf [file 41598_2021_990_MOESM1_ESM.pdf]

**SARS-CoV-2 IgG seropositivity in a cohort of 449 non-hospitalized individuals during Spanish COVID-19 lockdown.**

Patricia Torres Martínez MD, Paula Diaque García, María Rubio Salas, Raquel Rodríguez Sánchez MD, José Avendaño-Ortiz PhD, Sandra Guerrero-Monjo PhD, Felipe García, Miguel Ángel Llamas PhD, Eduardo López-Collazo PhD, Paula Saz-Leal PhD, Carlos del Fresno PhD

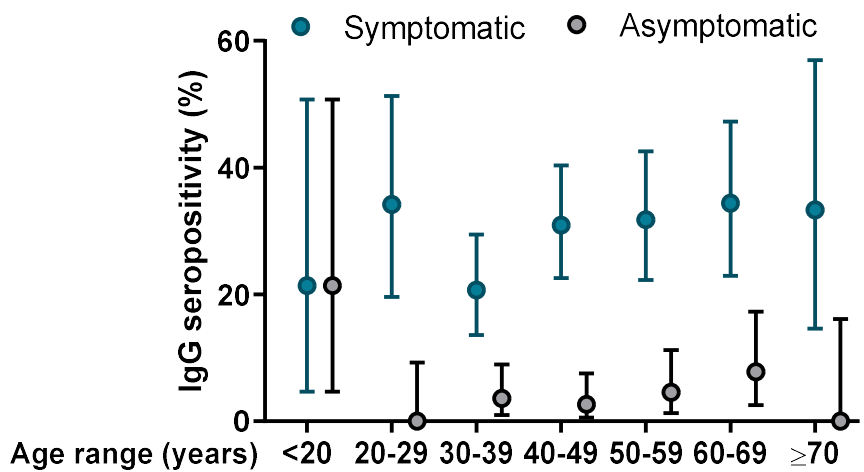

|                  |       |       |       |       |       |       |       |
|------------------|-------|-------|-------|-------|-------|-------|-------|
| Symptomatic (%)  | 21.43 | 34.21 | 20.72 | 30.97 | 31.82 | 34.38 | 33.33 |
| Asymptomatic (%) | 21.43 | 0.00  | 3.60  | 2.65  | 4.55  | 7.81  | 0.00  |

**Supplementary Figure 1. Symptomatology-dependent seropositivity of SARS-CoV-2 within age ranges.** Dots represent IgG+ symptomatic (blue) and asymptomatic (grey) subjects at given age ranges. Dots and vertical lines represent frequency and 95% confidence interval, respectively. Frequencies are further detailed in the bottom table.

**Supplementary Table 1.** COVID-19 compatible symptoms and close contact of study participants by occupation.

|                                                |                      | Frequency     |               |       | Univariate analysis |                     |
|------------------------------------------------|----------------------|---------------|---------------|-------|---------------------|---------------------|
|                                                |                      | %             | (95% CI)      | OR    | 95% CI              | P-value             |
| Symptoms compatible with COVID-19 <sup>1</sup> | Others <sup>2</sup>  | <b>70.47%</b> | (65.46-75.15) | 1     |                     | 0.366 <sup>3</sup>  |
|                                                | Healthcare workers   | <b>72.09%</b> | (56.33-84.67) | 1.08  | 0.53 to 2.19        |                     |
|                                                | Firefighters         | <b>66.67%</b> | (40.99-86.66) | 0.84  | 0.31 to 2.29        |                     |
|                                                | Police/Public safety | <b>55.17%</b> | (35.69-73.55) | 0.52  | 0.24 to 1.11        |                     |
| Any contact with confirmed case                | Others <sup>2</sup>  | <b>57.10%</b> | (51.80-62.28) | 1     |                     | <0.001 <sup>3</sup> |
|                                                | Healthcare workers   | <b>79.07%</b> | (63.96-89.96) | 2.83  | 1.32 to 6.09        |                     |
|                                                | Firefighters         | <b>94.44%</b> | (72.71-99.86) | 12.77 | 1.68 to 97.05       |                     |
|                                                | Police/Public safety | <b>72.41%</b> | (52.76-87.27) | 1.97  | 0.85 to 4.57        |                     |

<sup>1</sup> Fever, headache, cough, odynophagia, asthenia, myalgia, ageusia, anosmia, dyspnea, , gastrointestinal symptoms cutaneous manifestations and/or pneumonia diagnosis.

<sup>2</sup> Those patients that are not among the other three specific professions.

<sup>3</sup> Chi-square test.

OR: Odds Ratio. 95% CI: 95% Confidence Interval.

**Supplementary Table 2.** Forward logistic regression model.

|                             |                  | Forward multivariate analysis |                       |                  |
|-----------------------------|------------------|-------------------------------|-----------------------|------------------|
|                             |                  | OR                            | 95% CI                | P-value          |
| Smoker                      | No               | 1                             |                       |                  |
|                             | Yes              | <b>0.44</b>                   | <b>0.20 to 0.95</b>   | <b>0.037</b>     |
| PCR estatus                 | Never done       | 1                             |                       |                  |
|                             | Negative         | 1.42                          | 0.58 to 3.48          | 0.442            |
|                             | Positive         | <b>25.12</b>                  | <b>2.62 to 240.95</b> | <b>0.005</b>     |
| Contact with confirmed case | No contact       | 1                             |                       |                  |
|                             | Household member | <b>3.72</b>                   | <b>2.03 to 6.79</b>   | <b>&lt;0.001</b> |
|                             | Non-cohabitating | 1.48                          | 0.79 to 2.78          | 0.216            |
| COVID-19 Symptoms           | No               | 1                             |                       |                  |
|                             | Yes              | <b>2.49</b>                   | <b>1.33 to 4.66</b>   | <b>0.004</b>     |
| Type of symptoms            | Ageusia/Anosmia  | <b>13.67</b>                  | <b>7.32 to 25.53</b>  | <b>&lt;0.001</b> |
|                             | Odynophagia      | <b>0.36</b>                   | <b>0.19 to 0.66</b>   | <b>0.001</b>     |

OR: Odds Ratio. 95% CI: 95% Confidence Interval.

Variables significantly associated with seropositivity are highlighted in bold.
